# Supplementary material for: Highly selective CO2 separation membranes through tunable poly(4-vinylphenolate)–CO2 interactions
Source: Royal Society of Chemistry journal article supplement (doi:10.1039/c4ta03696d), 2014-01-01
Supplement: c4ta03696d1.pdf [file c4ta03696d1.pdf]

# Supporting Information „Highly Selective CO<sub>2</sub> Separation Membranes Through Tunable Poly(4-vinylphenolate)-CO<sub>2</sub> Interactions”

## Thermogravimetric Analysis (TGA) / Differential Scanning Calorimetry(DSC)

Table 1: Glass transition temperatures ( $T_g$ ) and melting points ( $T_m$ ) of poly(4-vinylphenol) (**1a**), poly(2-methoxy-4-vinylphenol) (**1b**), poly(2,6-dimethoxy-4-vinylphenol) (**1c**), the respective copolymers with di(ethylene glycol methyl ether methacrylate) (**2a-2c**) and selected corresponding tetraalkylphosphonium poly(4-vinylphenolate)s ([P<sub>xxxx</sub>][**1a-2c**]).

| Sample                    | $T_g$ [°C] | $T_m$ [°C] |
|---------------------------|------------|------------|
| 1a                        | 169.08     | -          |
| 1b                        | 97.41      | -          |
| 1c                        | 75.40      | -          |
| 2a                        | 57.70      | -          |
| 2b                        | 44.70      | -          |
| 2c                        | 46.07      | -          |
| [P <sub>66614</sub> ][1a] | -64.47     | 31.43      |
| [P <sub>44414</sub> ][1a] | -69.95     | 30.18      |
| [P <sub>4441</sub> ][1a]  | -83.35     | -61.44     |
| [P <sub>4444</sub> ][1a]  | -75.54     | 104.41     |
| [P <sub>66614</sub> ][1b] | -61.22     | 21.15      |
| [P <sub>66614</sub> ][1c] | -57.88     | 13.04      |
| [P <sub>66614</sub> ][2a] | -30.03     | -          |
| [P <sub>66614</sub> ][2b] | -30.08     | -          |
| [P <sub>66614</sub> ][2c] | -50.20     | -          |

## <sup>1</sup>H, <sup>31</sup>P and <sup>13</sup>C-MAS NMR Spectral Data

### Monomers:

**4-Vinylphenol:** (300 MHz, Methanol-*d*<sub>4</sub>)  $\delta$  (ppm) = 7.34 – 7.21 (2H, m), 6.87 – 6.72 (2H, m), 6.65 (1H, dd), 5.58 (1H, dd), 5.04 (1H, dd).

**2,6-Dimethoxy-4-vinylphenol:** 300 MHz, Methanol-*d*<sub>4</sub>)  $\delta$  (ppm) = 6.71 (2H, s), 6.62 (1H, dd), 5.61 (1H, dd), 5.07 (1H, dd), 3.84 (6H, s).

## Polymers:

**Poly(2-methoxy-4-vinylphenol) (1b):** (250 MHz, Methanol- $d_4$ ):  $\delta$  (ppm) = 6.88 – 5.80 (3H, m), 3.84 – 3.45 (3H, m), 2.40 – 0.81 (3H, m).

**Poly(2,6-dimethoxy-4-vinylphenol) (1c):** (300 MHz, Methanol- $d_4$ ):  $\delta$  (ppm) = 5.95 (2H, m), 3.65 (6H, m), 1.68 (3H, m).

**Poly(4-vinylphenol-co-di(ethylene glycol) methyl ether methacrylate) (2a):** (250 MHz, Methanol- $d_4$ )  $\delta$  (ppm) = 7.02 – 6.38 (4H, br), 4.16 – 3.33 (11H, br), 2.75 – 1.19 (5H, br), 1.11 – 0.42 (3H, br).

**Poly(2-methoxy-4-vinylphenol-co-di(ethylene glycol) methyl ether methacrylate) (2b):** (250 MHz, Methanol- $d_4$ )  $\delta$  (ppm) = 6.93 – 5.98 (3H, br), 4.21 – 3.44 (14H, br), 2.79 – 1.21 (5H, br), 1.19 – 0.36 (3H, br).

**Poly(2,6-dimethoxy-4-vinylphenol-co-di(ethylene glycol) methyl ether methacrylate) (2c):** (1H, 300 MHz, Methanol- $d_4$ ):  $\delta$  (ppm) = 1.33 (8H, br), 3.64 (17H, br), 6.24 (2H, br).

## Polyelectrolytes:

**Tributylmethylphosphonium Poly(4-vinylphenolate) ([P<sub>4441</sub>][1a]):** (31P, 360 MHz, Methanol- $d_4$ ):  $\delta$  (ppm) = 33.13 (1P, s)

**Tetrabutylphosphonium Poly(4-vinylphenolate) ([P<sub>4444</sub>][1a]):** (1H, 360 MHz, Methanol- $d_4$ )  $\delta$  (ppm) = 6.70 – 6.25 (4H, br), 2.29 – 2.15 (8H, m), 1.68 – 1.14 (19H, m), 0.96 (12H, m), (31P, 360 MHz, Methanol- $d_4$ ):  $\delta$  (ppm) = 33.14 (1P, s)

**Tributyltetradecylphosphonium Poly(4-vinylphenolate) ([P<sub>44414</sub>][1a]):** (1H, 360 MHz, Methanol- $d_4$ )  $\delta$  (ppm) = 6.70 – 6.25 (4H, br), 2.29 – 2.15 (8H, m), 1.68 – 1.14 (39H, m), 0.96 (12H, m), (31P, 360 MHz, Methanol- $d_4$ )  $\delta$  (ppm) = 33.14.

**Trihexyltetradecylphosphonium Poly(4-vinylphenolate) ([P<sub>66614</sub>][1a]):** (1H, 360 MHz, Methanol- $d_4$ )  $\delta$  (ppm) = 6.70 – 6.25 (4H, br), 2.29 – 2.15 (8H, m), 1.68 – 1.23 (48H, m), 0.96 (12H, m), (31P, 360 MHz, Methanol- $d_4$ )  $\delta$  (ppm) = 33.13, (13C CPMAS-NMR 4mm rotor, 12 kHz, 35400 scans)  $\delta$  (ppm) = 15.1, 23.8, 30.8, 33.0, 40.0, 49.7, ~119.0, ~120.0, ~132.0.

**Trihexyltetradecylphosphonium Poly(4-vinylphenolate)-CO<sub>2</sub> ([P<sub>66614</sub>][1a]-CO<sub>2</sub>):** (13C CPMAS-NMR 4mm rotor, 12 kHz, 45800 scans)  $\delta$  (ppm) = 15.1, 23.8, 30.8, 33.0, 40.0, ~117.0, ~127.0, ~133, 158.6, 162.2.

**Trihexyltetradecylphosphonium Poly(2-methoxy-4-vinylphenolate) ([P<sub>66614</sub>][1b]):** (1H, 360 MHz, Methanol- $d_4$ )  $\delta$  (ppm) = 6.70 – 6.25 (3H, br), 3.81 (3H, m), 2.29 – 2.15 (8H, m), 1.68 – 1.23 (48H, m), 0.96 (12H, m), (31P, 360 MHz, Methanol- $d_4$ )  $\delta$  (ppm) = 33.15.

**Trihexyltetradecylphosphonium Poly(2,6-dimethoxy-4-vinylphenolate) ([P<sub>66614</sub>][1c]):** (1H, 360 MHz, Methanol- $d_4$ ):  $\delta$  (ppm) = 5.99 (2H, br), 3.71 (6H, m), 2.29 – 2.15 (8H, m),

1.68 – 1.23 (48H, m), 0.96 (12H, m), ( $^{31}\text{P}$ , 360 MHz, Methanol- $d_4$ , 300K):  $\delta$  (ppm) = 56.72, 34.62.

**Trihexyltetradecylphosphonium Poly(4-vinylphenolate co-di(ethylene glycol) methyl ether methacrylate) ([P<sub>66614</sub>][2a]):** ( $^1\text{H}$ , 250 MHz, Methanol- $d_4$ )  $\delta$  (ppm) = 7.02 – 6.38 (4H, br), 4.16 – 3.33 (11H, br), 2.75 – 1.19 (5H, br), 2.29 – 2.15 (8H, m), 1.68 – 1.23 (48H, m), 1.11 – 0.42 (3H, br), 0.96 (m, 12H), ( $^{31}\text{P}$ , 360 MHz, Methanol- $d_4$ )  $\delta$  (ppm) = 33.13.

**Trihexyltetradecylphosphonium Poly(2-methoxy-4-vinylphenolate-co-di(ethylene glycol) methyl ether methacrylate) [P<sub>66614</sub>][2b]:** ( $^1\text{H}$ , 360 MHz, Methanol- $d_4$ ):  $\delta$  (ppm) = 6.70 – 6.25 (3H, br), 4.16 – 3.33 (11H, br), 3.81 (3H, m), 2.75 – 1.19 (5H, br), 2.29 – 2.15 (8H, m), 1.68 – 1.23 (48H, m), 1.11 – 0.42 (3H, br), 0.96 (m, 12H), ( $^{31}\text{P}$ , 360 MHz, Methanol- $d_4$ )  $\delta$  (ppm) = 33.15

**Trihexyltetradecylphosphonium Poly(2,6-dimethoxy-4-vinylphenolate co-di(ethylene glycol) methyl ether methacrylate) [P<sub>66614</sub>][2c]:** ( $^1\text{H}$ , 360 MHz, Methanol- $d_4$ ):  $\delta$  (ppm) = 5.99 (2H, m), 3.71 (6H, m), 4.16 – 3.33 (11H, br), 2.75 – 1.19 (5H, br), 2.29 – 2.15 (8H, m), 1.68 – 1.23 (48H, m), 1.11 – 0.42 (3H, br), 0.96 (m, 12H), ( $^{31}\text{P}$ , 360 MHz, Methanol- $d_4$ ):  $\delta$  (ppm) = 56.72, 34.62.

## ATR FT-IR

**Poly(4-vinylphenol)(1a):** (ATR-IR,  $\text{cm}^{-1}$ ) 3.050-3.600 broad, 3.020, 2.820, 1.600, 1.510, 1.450, 1.380, 1.230, 1.170, 1.130, 1.040, 830, 720.

**Trihexyltetradecylphosphonium Poly(4-vinylphenolate) ([P<sub>66614</sub>][1a]):** (ATR-IR,  $\text{cm}^{-1}$ ) 1.930, 1.900, 1.840, 1.600, 1.450, 1.230, 1.170, 1040, 830, 720.

**Trihexyltetradecylphosphonium Poly(4-vinylphenolate)-CO<sub>2</sub> ([P<sub>66614</sub>][1a]-CO<sub>2</sub>):** (ATR-IR,  $\text{cm}^{-1}$ ) 1.930, 1.900, 1.840, 1.600, 1.510, 1.450, 1.230, 1.170, 1040, 830, 720.

## Density

Table 2: Density at 25 °C as determined by the solvent flotation method or a volumetric method (†)

---

| <b>Sample</b>             | <b><math>\rho</math> [g / cm<sup>3</sup>]</b> |
|---------------------------|-----------------------------------------------|
| [P <sub>44414</sub> ][1a] | 0.98±0.020                                    |
| [P <sub>4441</sub> ][1a]  | 0.99±0.04†                                    |
| [P <sub>4444</sub> ][1a]  | 1.00±0.018                                    |
| [P <sub>66614</sub> ][1a] | 1.02±0.015                                    |
| [P <sub>66614</sub> ][1b] | 1.00±0.04†                                    |
| [P <sub>66614</sub> ][1c] | 0.98±0.05†                                    |
| [P <sub>66614</sub> ][2a] | 0.97±0.005                                    |
| [P <sub>66614</sub> ][2b] | 0.99±0.020                                    |
| [P <sub>66614</sub> ][2c] | 1.00±0.05†                                    |

# Solubility and Free Fractional Volume Sheet

| Substance     | Count per Effective Repeating Unit |    |   |   |    |     |     |                           |         |         | Volume Calculation |                       |                     |                 |       |      |       |               |      |     | FFV  | CO2-solubility [wt%] | CO2-solubility [V(STP)/V] | CO2-solubility [V(STP)/V] |
|---------------|------------------------------------|----|---|---|----|-----|-----|---------------------------|---------|---------|--------------------|-----------------------|---------------------|-----------------|-------|------|-------|---------------|------|-----|------|----------------------|---------------------------|---------------------------|
|               | C                                  | H  | O | P | Nb | Ra  | Rna | Σ V <sub>Bondi</sub> [Å³] | 5.92*Nb | 14.7*Ra | 3.8*Rna            | V <sub>VDW</sub> [Å³] | V <sub>0</sub> [Å³] | M <sub>ru</sub> | ρ     | V    | V     | [Å³/molecule] |      |     |      |                      |                           |                           |
| [P4441][1a]   | 21                                 | 27 | 1 | 1 | 1  | 59  | 1   | 0                         | 666.74  | 349.28  | 14.7               | 0                     | 302.8               | 393.6           | 326.4 | 0.99 | 1.010 | 547.5         | 0.28 | 1.1 | 5.5  |                      |                           |                           |
| [P4444][1a]   | 24                                 | 33 | 1 | 1 | 1  | 66  | 1   | 0                         | 771.91  | 390.72  | 14.7               | 0                     | 366.5               | 476.4           | 368.5 | 0.99 | 1.010 | 618.1         | 0.23 | 0.6 | 3    |                      |                           |                           |
| [P44414][1a]  | 34                                 | 53 | 1 | 1 | 1  | 96  | 1   | 0                         | 1122.47 | 568.32  | 14.7               | 0                     | 539.5               | 701.3           | 508.8 | 0.98 | 1.020 | 862.1         | 0.19 | 2.7 | 13.4 |                      |                           |                           |
| [P66614][1a]  | 40                                 | 75 | 1 | 1 | 1  | 114 | 1   | 0                         | 1405.19 | 674.88  | 14.7               | 0                     | 715.6               | 930.3           | 603.0 | 1.02 | 0.980 | 981.7         | 0.05 | 2.3 | 11.8 |                      |                           |                           |
| [P66614][1b]  | 41                                 | 77 | 2 | 1 | 1  | 118 | 1   | 0                         | 1454.96 | 698.56  | 14.7               | 0                     | 741.7               | 964.2           | 633.0 | 1    | 1.000 | 1051.2        | 0.08 | 1.7 | 8.6  |                      |                           |                           |
| [P66614][1c]  | 42                                 | 79 | 3 | 1 | 1  | 122 | 1   | 0                         | 1504.72 | 722.24  | 14.7               | 0                     | 767.8               | 998.1           | 663.1 | 0.98 | 1.020 | 1123.5        | 0.11 | 0.7 | 3.5  |                      |                           |                           |
| [P66614][2a]  | 49                                 | 91 | 5 | 1 | 1  | 144 | 1   | 0                         | 1765.06 | 852.48  | 14.7               | 0                     | 897.9               | 1167.2          | 791.2 | 0.97 | 1.031 | 1354.5        | 0.14 | 2.6 | 12.7 |                      |                           |                           |
| [P66614][2b]  | 50                                 | 93 | 6 | 1 | 1  | 148 | 1   | 0                         | 1814.83 | 876.16  | 14.7               | 0                     | 924.0               | 1201.2          | 821.2 | 0.99 | 1.010 | 1377.5        | 0.13 | 2   | 10.0 |                      |                           |                           |
| [P66614][2c]  | 51                                 | 95 | 7 | 1 | 1  | 152 | 1   | 0                         | 1864.59 | 899.84  | 14.7               | 0                     | 950.1               | 1235.1          | 851.3 | 1    | 1.000 | 1413.6        | 0.13 | 3.4 | 17.2 |                      |                           |                           |
| Poly(DEGMEMA) | 9                                  | 16 | 4 | 0 | 0  | 30  | 0   | 0                         | 359.87  | 177.6   | 0                  | 0                     | 182.3               | 236.9           | 188.2 | 1.02 | 0.980 | 306.4         | 0.23 | 0   | 0.0  |                      |                           |                           |

  

|                               |       |     |      |      |
|-------------------------------|-------|-----|------|------|
| Bondi radii [Å] [Bondi, 1964] | C     | H   | O    | P    |
|                               | 1.7   | 1.2 | 1.52 | 1.8  |
| VDW Volume [Å³]               | 20.6  | 7.2 | 14.7 | 24.4 |
| Atom mass [unit]              | 12.01 | 1   | 16   | 31   |
| V_CO2 STP [cm³/g]             | 505.1 |     |      |      |
| Na                            | 6E+23 |     |      |      |

  

|                    |       |
|--------------------|-------|
| conversion factors |       |
| Å³ to cm³          | 1E-24 |
| unit to gram       | 2E-24 |

## Single Gas Transmission Rates (GTR) and Coating Thickness

Table 4: Gas transmission rates (GTR) and ideal permeability selectivities  $\alpha$  of CO<sub>2</sub> and N<sub>2</sub> through composite membranes prepared from materials [P<sub>66614</sub>][1a]-[P<sub>66614</sub>][2c] at 15 °C and at 25 °C.

| Polyelectrolyte           | GTR [Ld <sup>-1</sup> m <sup>-2</sup> bar <sup>-1</sup> ] |                |                 |                | $\alpha_{\text{CO}_2/\text{N}_2}$ |       |
|---------------------------|-----------------------------------------------------------|----------------|-----------------|----------------|-----------------------------------|-------|
|                           | 15 °C                                                     |                | 25 °C           |                | 15 °C                             | 25 °C |
|                           | CO <sub>2</sub>                                           | N <sub>2</sub> | CO <sub>2</sub> | N <sub>2</sub> |                                   |       |
| [P <sub>66614</sub> ][1a] | 742                                                       | 35.0           | 770             | 57.0           | 21.20                             | 13.51 |
| [P <sub>66614</sub> ][1b] | 430                                                       | 28.5           | 463             | 35.0           | 15.09                             | 13.23 |
| [P <sub>66614</sub> ][1c] | 385                                                       | 17.3           | 487             | 25.7           | 22.23                             | 18.95 |
| [P <sub>66614</sub> ][2a] | 282                                                       | 6.50           | 303             | 12.2           | 43.38                             | 24.85 |
| [P <sub>66614</sub> ][2b] | 207                                                       | 4.80           | 160             | 5.34           | 43.13                             | 29.96 |
| [P <sub>66614</sub> ][2c] | 199                                                       | 2.94           | 347             | 11.3           | 67.69                             | 30.71 |

Permeability may be substantially influenced by sorption- or pressure-induced phenomena such as plasticization and compaction. In these cases, gas permeability is no longer independent of absolute permeate- and retentate side pressure levels, which could not be varied in the permeation measurement setup. Also, potential chemical transport facilitation is sensitive to back pressure of the permeate species.

## Punctual Coating Thickness Measurements according to SEM

Table 5: Coating thickness  $d$  of composite membranes prepared from materials [P<sub>66614</sub>][1a]-[P<sub>66614</sub>][2c] as measured punctually by scanning electron microscopy (SEM).

| Polyelectrolyte           | $d$ [ $\mu\text{m}$ ] |
|---------------------------|-----------------------|
| [P <sub>66614</sub> ][1a] | 5.15                  |
| [P <sub>66614</sub> ][1b] | 4.40                  |
| [P <sub>66614</sub> ][1c] | 3.98                  |
| [P <sub>66614</sub> ][2a] | 3.69                  |
| [P <sub>66614</sub> ][2b] | 5.51                  |
| [P <sub>66614</sub> ][2c] | 8.85                  |

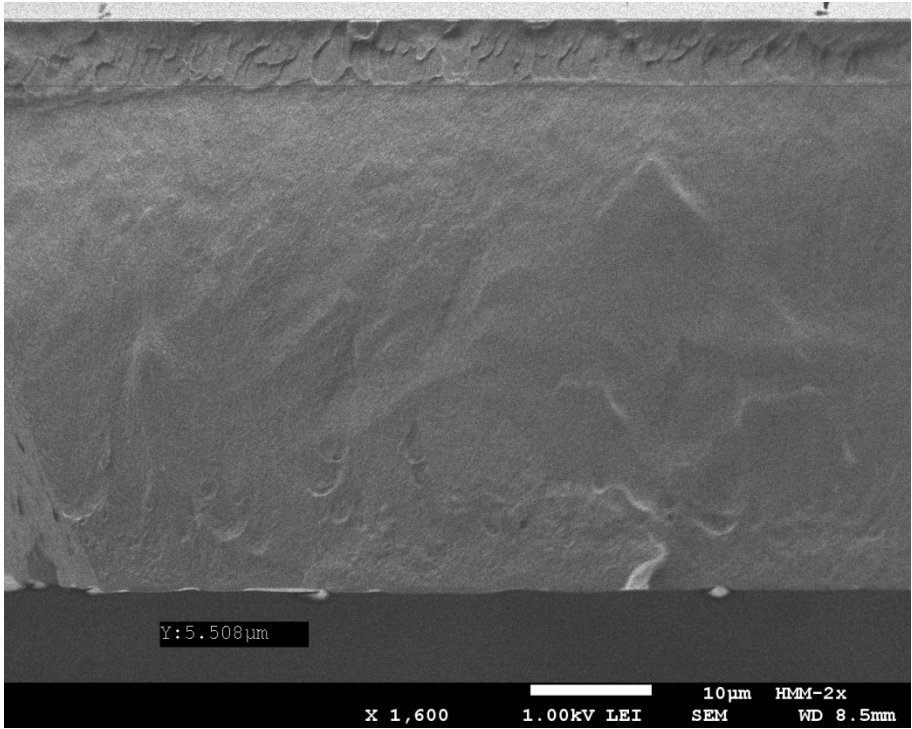

Figure 1: Exemplary cross-section SEM image of a composite membrane composed of a polysiloxane-based flat-sheet substrate and a coating of Trihexyltetradecylphosphonium Poly(2-methoxy-4-vinylphenolate-co-di(ethylene glycol) methyl ether methacrylate) ([P<sub>66614</sub>][2b])

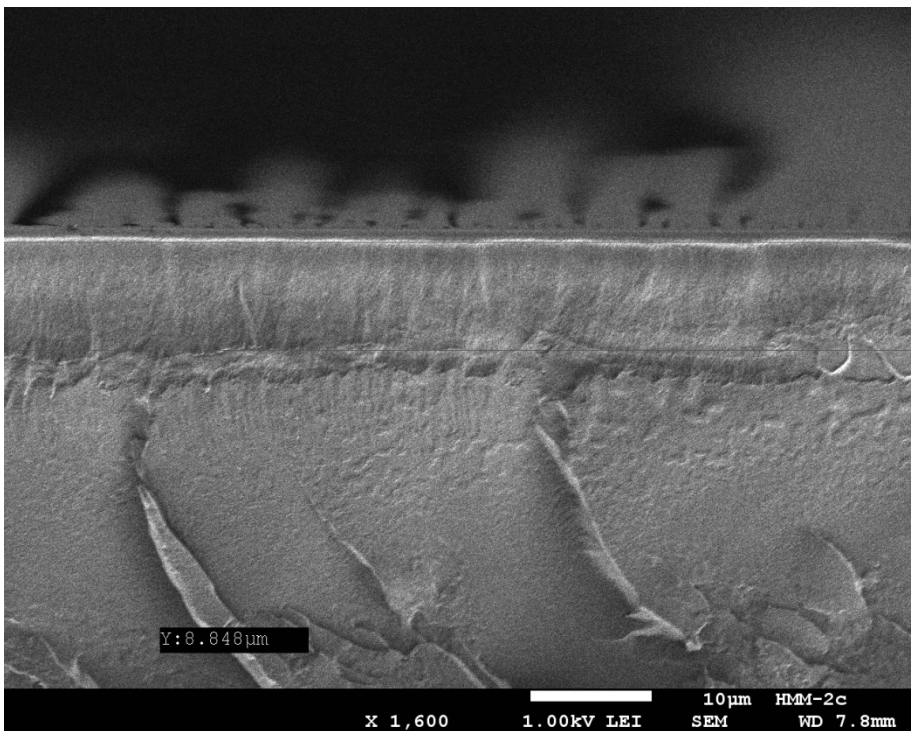

Figure 2: Exemplary cross-section SEM image of a composite membrane composed of a polysiloxane-based flat-sheet substrate and a coating of Trihexyltetradecylphosphonium Poly(2,6-dimethoxy-4-vinylphenolate-co-di(ethylene glycol) methyl ether methacrylate) ([P<sub>66614</sub>][2c])

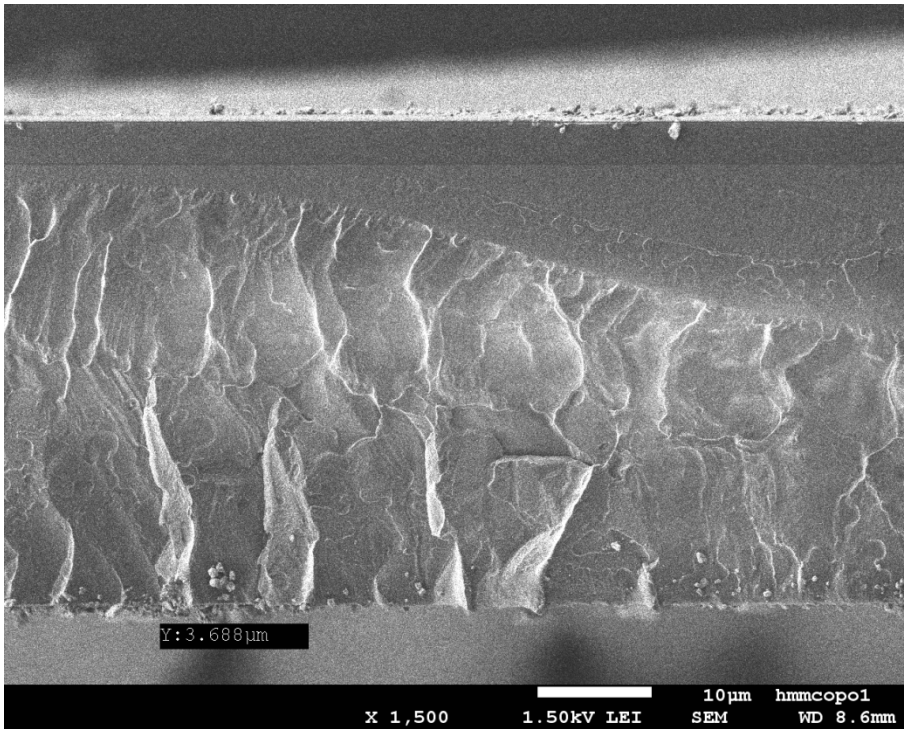

Figure 3: Exemplary cross-section SEM image of a composite membrane composed of a polysiloxane-based flat-sheet substrate and a coating of Trihexyltetradecylphosphonium Poly(4-vinylphenolate-co-di(ethylene glycol) methyl ether methacrylate) ([P<sub>66614</sub>][2a])
